# Supplementary material for: Cerebellar Degeneration in Epilepsy: A Systematic Review
Source: PubMed Central journal article supplement (PMC7827978; doi:10.3390/ijerph18020473), 2021-01-08
Supplement: ijerph-18-00473-s001.pdf [file ijerph-18-00473-s001.pdf]

## Supplementary Material

|                                                                   |      |
|-------------------------------------------------------------------|------|
| <b>Total number of articles included in this review</b>           | 50   |
| <b>Total number of patients with epilepsy</b>                     | 2826 |
| <b>Total number of patients with temporal lobe epilepsy (TLE)</b> | 1503 |
| <b>Total number of pharmaco-resistant patients</b>                | 1128 |
| <b>Total number of patients using phenytoin</b>                   | 914  |

**Table S1.** Summary of main results

| <b>Study design</b>                | <b>Cross-sectional</b>    | <b>Correlational</b>  | <b>Cohort</b>             | <b>Case Control</b>     | <b>Longitudinal</b> |
|------------------------------------|---------------------------|-----------------------|---------------------------|-------------------------|---------------------|
| <b>Author, year of publication</b> | Shanmugarajah et al, 2018 | Bohnen et al, 1998    | McDonald et al, 2008      | Hellwig et al, 2013 ‡   | Liu et al, 2005     |
|                                    | Alhusaini et al, 2012     | Botez et al, 1988     | Specht et al, 1997b       | Bekkelund et al, 1996 ‡ |                     |
|                                    | Bileviciuis et al, 2010   | Ballenger et al, 1982 | Iivanainen et al, 1977 ‡  | Ney et al, 1994 ‡       |                     |
|                                    | Bonilha et al, 2004       | Crooks et al, 2000    | Savic et al, 1996         | Sandok et al, 2000 ‡    |                     |
|                                    | Hagemann et al, 2002      | De Marco et al, 2003  | Rambeck et al, 1992       | Jibiki et al, 1993 ‡    |                     |
|                                    | Bonilha et al, 2010       | Benvenuti et al, 1992 | Recio et al, 2007 ‡       | Rajjoub et al, 1976 ‡   |                     |
|                                    | Hermann et al, 2004       | Luef et al, 1996      | Nakazawa and Ohkawa, 1980 | Blum et al, 1998 ‡      |                     |
|                                    | Keller et al, 2004        | Park et al, 2015      |                           | Robertson et al, 1979   |                     |
|                                    | Lee et al, 2003           | Salcman et al, 1978   |                           | Sequeira et al, 2013 ‡  |                     |
|                                    | Misra et al, 1997         | Scanlon et al, 2011   |                           | Shields et al, 2002 ‡   |                     |
|                                    | Oyegbile et al, 2011      | Specht et al, 1997a   |                           |                         |                     |
|                                    | Marcian et al, 2018       | Szabo et al, 2006     |                           |                         |                     |
|                                    | Riederer et al, 2008      | Luef et al, 1994      |                           |                         |                     |
|                                    | Theodore et al, 1987      | Specht et al, 1994    |                           |                         |                     |
|                                    | Hermann et al, 2005       |                       |                           |                         |                     |
|                                    | Alvim et al, 2016         |                       |                           |                         |                     |
|                                    | Keller et al, 2002        |                       |                           |                         |                     |
|                                    | Savic and Thorell, 1996   |                       |                           |                         |                     |

‡ Retrospective studies

**Table S2.** Summary of study types included
